# Supplementary material for: Long-Term Employment Outcomes among Female Cancer Survivors
Source: PubMed Central journal article supplement (PMC7215616; doi:10.3390/ijerph17082751), 2020-04-16
Supplement: ijerph-17-02751-s001.pdf [file ijerph-17-02751-s001.pdf]

**Table S1.** Effect of Length of Cancer Survivorship and Occupation Type on Odds of Employment among Cancer Survivors<sup>a</sup>

| Variable                                                      | Model 1                | Model 2                            |
|---------------------------------------------------------------|------------------------|------------------------------------|
|                                                               | Years since diagnosis  | Years since diagnosis × occupation |
|                                                               | OR (S.E.) <sup>b</sup> | OR (S.E.) <sup>b</sup>             |
| <b>Years since cancer diagnosis (ref: ≤ 2 years)</b>          |                        |                                    |
| 3-5 years                                                     | .29(.14)*              | .64(.51)                           |
| 6-10 years                                                    | .37(.18)*              | .69(.52)                           |
| >10 years                                                     | .24(.12)**             | .52(.39)                           |
| <b>Occupational status (ref: unskilled/manual)</b>            |                        |                                    |
| Professional types of occupation                              | 1.19(.27)              | 3.69(3.37)                         |
| <b>Interaction Terms (years since diagnosis × occupation)</b> |                        |                                    |
| 3-5 years × professional                                      |                        | .26(.27)                           |
| 6-10 years × professional                                     |                        | .35(.34)                           |
| >10 years × professional                                      |                        | .29(.27)                           |

<sup>a</sup>Note: N = 483 individuals; Observations = 1,709

<sup>b</sup>Odds Ratio (Standard Error) are based on random slope logistic regression models adjusted for age, race/ethnicity, education, marital status, economic recession experience, children in the household, family income, type of health insurance, self-rated health, fatigue, depressive symptoms, and current cancer treatment; \* p < .05. \*\* p < .01. \*\*\* p < .001

**Table S2.** Effect of Length of Cancer Survivorship and Occupation Type on Weekly Hours Worked among Cancer Survivors<sup>a</sup>

| Variable                                                      | Model 1                | Model 2                            |
|---------------------------------------------------------------|------------------------|------------------------------------|
|                                                               | Years since diagnosis  | Years since diagnosis × occupation |
|                                                               | OR (S.E.) <sup>b</sup> | OR (S.E.) <sup>b</sup>             |
| <b>Years since cancer diagnosis (ref: 1-2 years)</b>          |                        |                                    |
| 3-5 years                                                     | -5.96(2.65)*           | -9.43(4.70)*                       |
| 6-10 years                                                    | -5.58(2.49)*           | -9.47(4.40)*                       |
| >10 years                                                     | -6.17(2.51)*           | -5.18(4.32)                        |
| <b>Occupational status (ref: unskilled/manual)</b>            |                        |                                    |
| Professional types of occupation                              | -3.02(1.38)*           | -4.92(4.78)                        |
| <b>Interaction Terms (years since diagnosis × occupation)</b> |                        |                                    |
| 3-5 years × professional                                      |                        | 5.21(5.66)                         |
| 6-10 years × professional                                     |                        | 5.67(5.28)                         |
| >10 years × professional                                      |                        | -.93(5.09)                         |

<sup>a</sup>Note: N = 333 individuals; Observations = 1,167

<sup>b</sup>Coefficients are based on random slope coefficient models adjusted for the covariates; \* p < .05. \*\* p < .01. \*\*\* p < .001
